# Supplementary material for: Automatic delineation and quantification of pulmonary vascular obstruction index in patients with pulmonary embolism using Perfusion SPECT-CT: a simulation study
Source: PubMed Central journal article supplement (PMC8257882; doi:10.1186/s40658-021-00396-1), 2021-07-05
Supplement: 40658_2021_396_MOESM1_ESM.pdf [file 40658_2021_396_MOESM1_ESM.pdf]

## ***PE scenarii definition***

| <b>Code</b> | <b>Anatomical definition</b> |
|-------------|------------------------------|
| L1          | Right upper lobe (RUL)       |
| L2          | Right middle lobe (RML)      |
| L3          | Right lower lobe (RLL)       |
| L4          | Left upper lobe (LUL)        |
| L5          | Left lower lobe (LLL)        |
| L6          | LLL + RUL                    |
| L7          | RLL + RML                    |
| S5 1        | Right S1 (RS1)               |
| S5 2        | Left S2 (LS2)                |
| S5 3        | RS3                          |
| S5 4        | LS4                          |
| S5 5        | RS5                          |
| S5 6        | LS6                          |
| S5 7        | RS7                          |
| S5 8        | LS8                          |
| S5 9        | RS9                          |
| S5 10       | LS10                         |
| S10 1       | RS2+LS3                      |
| S10 2       | RS6+LS9                      |
| S10 3       | RS4+LS5                      |
| S20 1       | LS2+RS1+RS10+LS4             |
| S20 2       | RS5+RS6+LS10+LS5             |
| S20 3       | LS1+LS6+RS7+RS3              |
| S30 1       | RS1+RS4+RS6+LS3+LS5+LS10     |

|        |                                                           |
|--------|-----------------------------------------------------------|
| S30 2  | RS3+RS5+RS8+LS1+LS4+LS7                                   |
| S30 3  | RS2+RS7+RS8+LS4+LS6+LS8                                   |
| S40 1  | RS2+RS4+RS5+RS9+RS10+LS6+LS7                              |
| S40 2  | RS3+RS8+RS9+LS4+LS5+LS9+LS10+LS3                          |
| S40 3  | RS4+RS5+RS6+RS8+LS1+LS3+LS6+LS8                           |
| S50 1  | RS1+RS2+RS3+RS6+RS10+LS4+LS5+LS8+LS9+LS10                 |
| S50 2  | RS4+RS5+RS2+RS9+RS8+LS1+LS3+LS7+LS8+LS10                  |
| S50 3  | RS1+RS4+RS6+RS10+RS8+LS3+LS5+LS8+LS7+LS10                 |
| s60 1  | RS1+RS3+RS5+RS6+RS7+RS9+LS1+LS2+LS3+LS4+LS9+LS10          |
| s60 2  | RS2+RS4+RS5+RS8+RS9+RS10+LS3+LS5+LS6+LS7+LS8+LS10         |
| s70 1  | RS1+RS3+RS4+RS5+RS7+RS8+RS9+LS1+LS2+LS4+LS5+LS7+LS8+LS9   |
| s70 2  | RS2+RS3+RS5+RS6+RS8+RS9+RS10+LS1+LS2+LS3+LS6+LS7+LS8+LS10 |
| SS5 1  | subRS6+subRS5                                             |
| SS5 2  | subRS5+subLS1                                             |
| SS10 1 | subRS1+subRS10+subRS6+subLS1                              |
| SS10 2 | subRS9+subRS1+subLS8+subRS5                               |
| SS15 1 | subRS1+subRS2+subLS8+subLS10+subRS5+subLS1                |
| SS15 2 | subRS6LS5+subRS2+subLS1+subLS5+subLS10                    |
| ss20 1 | subRS2+subRS3+subRS5+subRS9+subLS2+subLS4+subLS6+subLS8   |
| ss20 2 | subRS1+subRS4+subRS6+subRS8+subLS1+subLS3+subLS7+subLS9   |
